# Supplementary material for: Dilated cardiomyopathy impairs mitochondrial biogenesis and promotes inflammation in an age- and sex-dependent manner
Source: publisher site journal article supplement (doi:10.18632/aging.202283), 2020-12-02
Supplement: Supplementary file [file aging-v12i23-202283-supplementary-material-SD1.pdf]

## SUPPLEMENTARY FIGURES

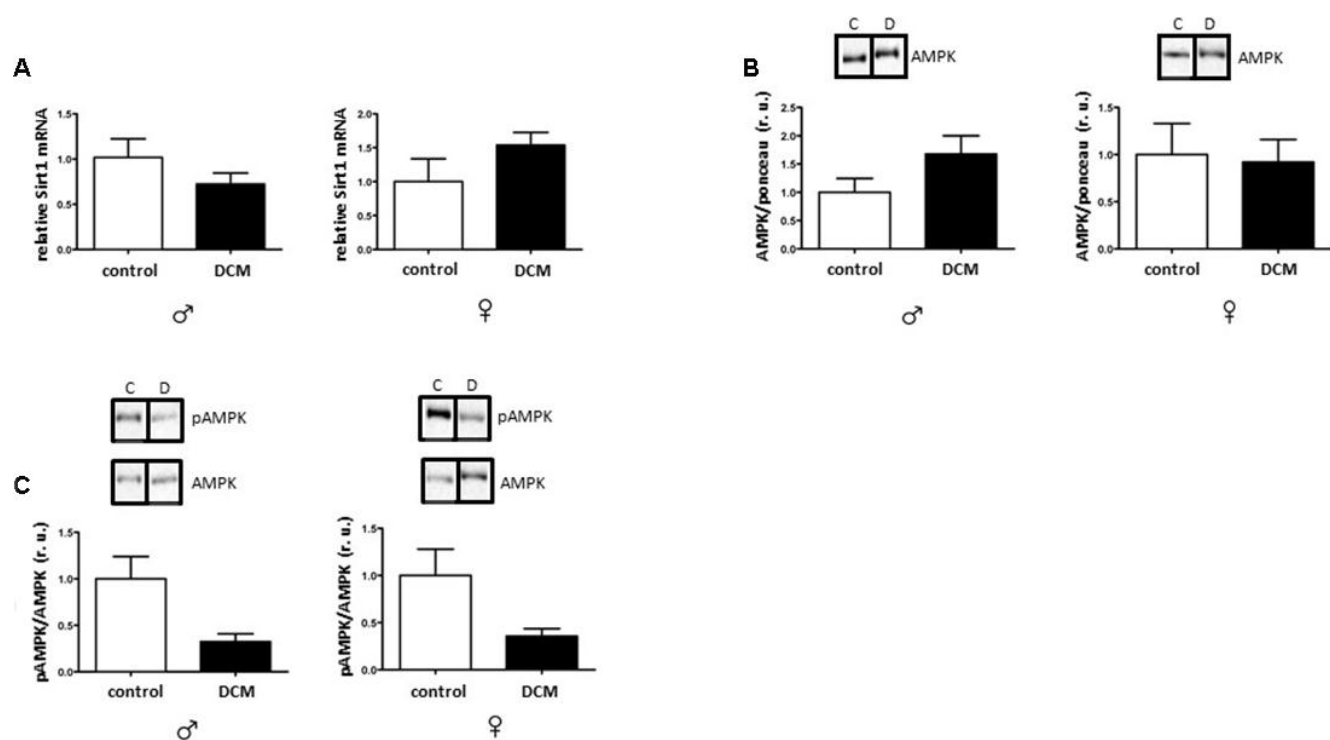

**Supplementary Figure 1. DCM effects on Sirt1 expression and AMPK phosphorylation in young patients.** Western blot expression analysis of Sirt1 (A), AMPK (B) and phosphorylated AMPK (Thr172) (C) performed with human cardiac tissue lysates from young control (non-diseased) or DCM men (♂) and women (♀). Proteins were normalized to actin or ponceau. Data are shown as the mean  $\pm$  SEM (n=5). Representative imaging of western blot analysis; the lanes were run in two gels. All data were normalized to the corresponding control and expressed in relative units (r.u.).

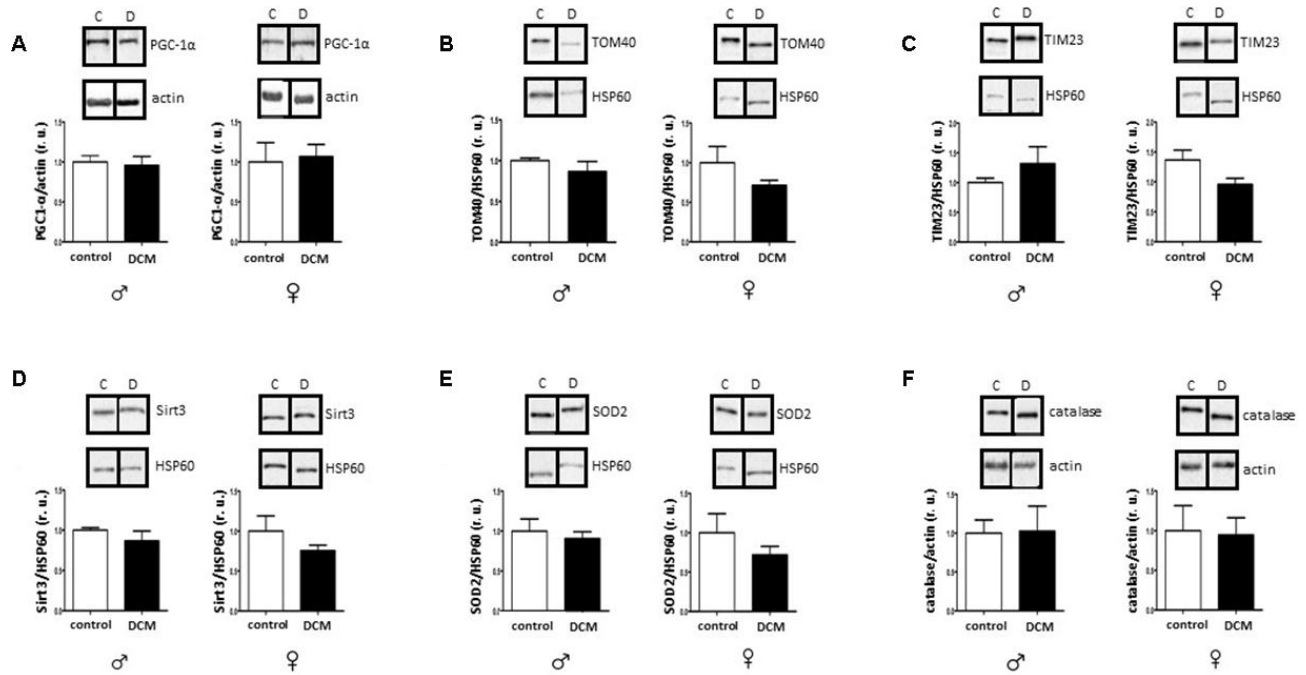

**Supplementary Figure 2. DCM effects on expression of mitochondrial proteins in young patients.** Western blot analysis and statistical analysis of PGC1- $\alpha$  (A), TOM40 (B), TIM23 (C), Sirt3 (D), SOD2 (E) and catalase (F) protein expression performed with human cardiac tissue lysates from young control (non-diseased) or DCM men (♂) and women (♀). Proteins were normalized to HSP60 or actin. Data are shown as the mean  $\pm$  SEM (n= 5). Representative imaging of western blot analysis; the lanes were run in two gels. All data were normalized to the corresponding control and expressed in relative units (r.u.).

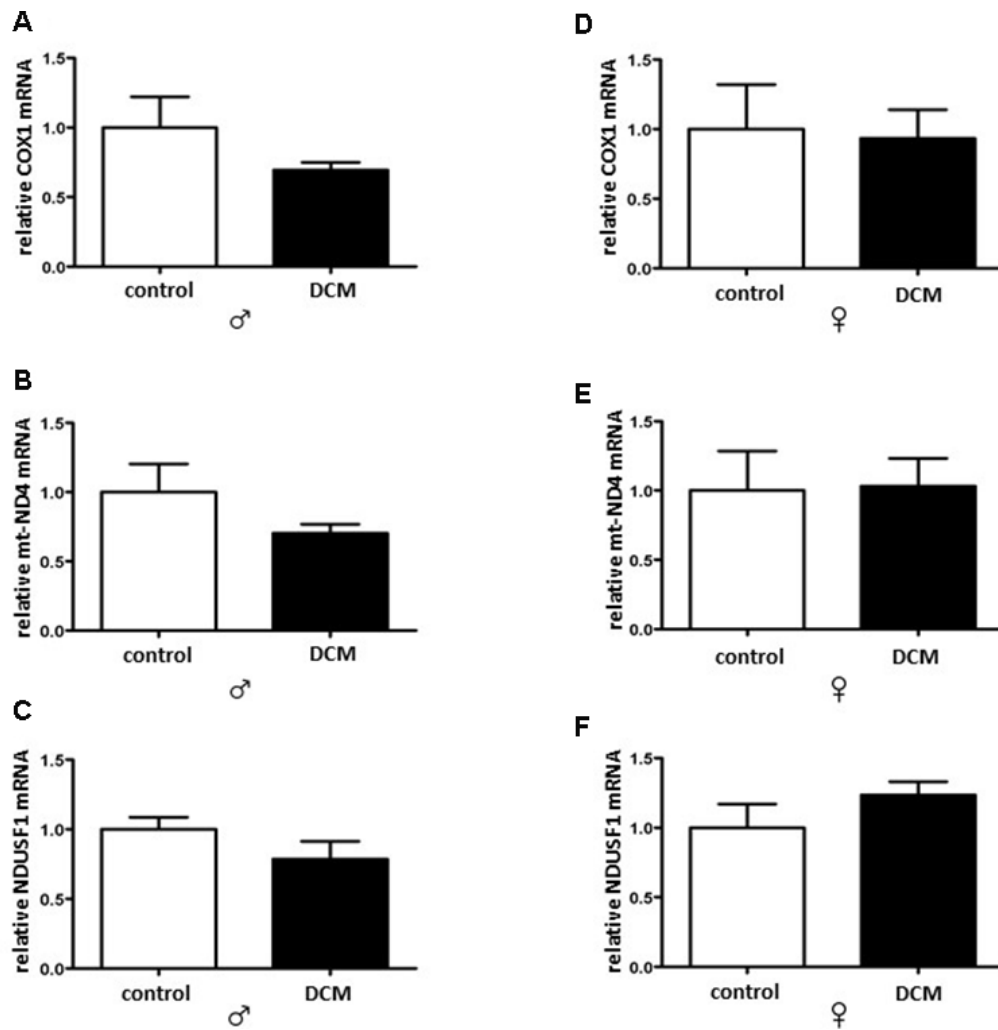

**Supplementary Figure 3. DCM effects on expression of mitochondrial genes in young patients.** Real-time PCR analysis for the mitochondrial-encoded genes *cox1* (A, B) and *mt-nda4* (C, D), as well as the nuclear-encoded genes *ndusf1* (E, F), performed with human cardiac tissue lysates from young control (non-diseased) or DCM men (♂) and women (♀). Data are shown as the mean  $\pm$  SEM (n= 5).

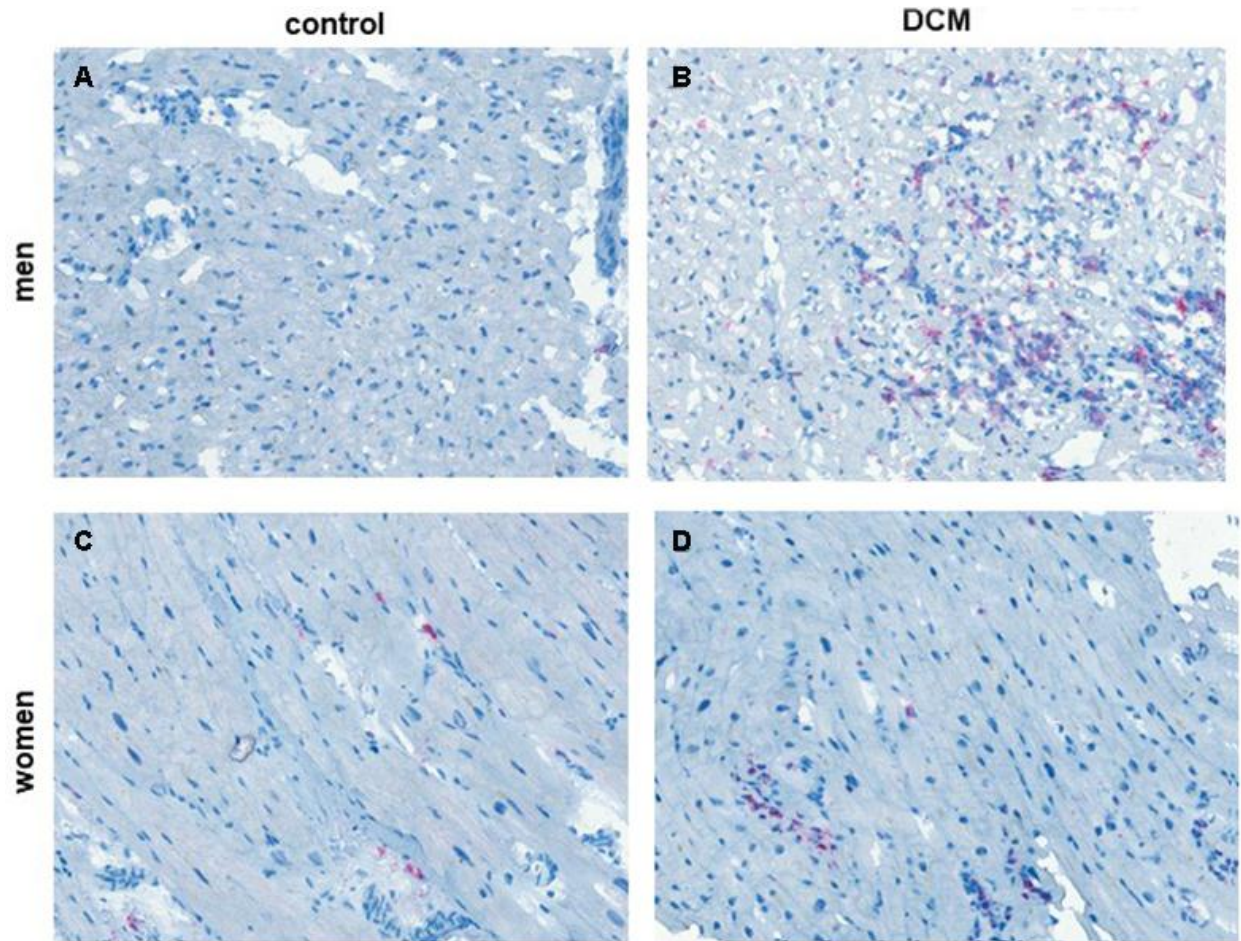

**Supplementary Figure 4. DCM effects on the number of macrophages in cardiac tissue of DCM patients.** Representative images of cardiac cryosections stained with antibodies against CD68 (A–D). The analyses were performed with myocardium from old control (non-diseased) and DCM men and women. Magnification: 200x.
